# Supplementary material for: Conformational polymorphism in a mononuclear phosphanegold(I) thiocarbamato species, Cy3PAu[SC(OEt)=N(C6H4Cl-3)]
Source: publisher site journal article supplement (doi:10.1515/zkri-2024-0124), 2025-03-28
Supplement: Supplementary file 1 [file j_zkri-2024-0124_suppl_005.docx]

Conformational polymorphism in a mononuclear phosphanegold(I) thiocarbamato species, Cy3PAu[SC(OEt)=N(C6H4Cl-3)]

Chien Ing Yeo 1, Yee Seng Tan 1, Wai Kit Tang 2 and Edward R. T. Tiekink 3,*

1 Sunway Biofunctional Molecules Discovery Centre, School of Medical and Life Sciences, Sunway University, Bandar Sunway 47500, Selangor Darul Ehsan, Malaysia

2 Department of Chemistry, Universiti Malaya, Kuala Lumpur 50603, Malaysia

3 Department of Chemistry, Universitat de les Illes Balears, Crta de Valldemossa km 7.5, 07122 Palma de Mallorca, Spain

Correspondence: [edward.tiekink@uib.es](mailto:edward.tiekink@uib.es)

**### SUPPLEMENTARY MATERIAL ###**

**Figure S1.** IR spectra for (a) **α**-form and (b) **β**-form of **1** measured in the range 4000 to 400 cm−1 on a Bruker Vertex 70v FTIR spectrophotometer (Bruker, Billerica, MA, USA).

**Figure S2.** (a) 1H, (b) 13C{1H} and (c) 31P{1H} NMR spectra for **1** measured in CDCl3 solution on a Bruker Ascend 400 MHz NMR spectrometer. The spectra for the both **α**- and **β**-forms are identical.





(a)





(b)

**Figure S1.** IR spectra for (a) **α**-form and (b) **β**-form of **1** measured in the range 4000 to 400 cm−1 on a Bruker Vertex 70v FTIR spectrophotometer (Bruker, Billerica, MA, USA).





(a)





(b)





(c)

**Figure S2.** (a) 1H, (b) 13C{1H} and (c) 31P{1H} NMR spectra of **1** measured in CDCl3 solution on a Bruker Ascend 400 MHz NMR spectrometer (Bruker, Billerica, MA, USA). The spectra for the both **α**- and **β**-forms are identical.
